# Supplementary material
Source: publisher figshare collection journal article supplement (https://frontiersin.figshare.com/ndownloader/files/14629361)
Supplement: Supplementary file [file 14629361]

*Supplementary Material*

**Eumelanin Graphene-Like Integration: The Impact on Physical Properties and Electrical Conductivity**

Roberto Di Capua, Valentina Gargiulo, Michela Alfè, Gabriella Maria De Luca, Tomáš Skála, Gregor Mali, Alessandro Pezzella\*

\* Correspondence: [alessandro.pezzella@unina.it](mailto:alessandro.pezzella@unina.it)

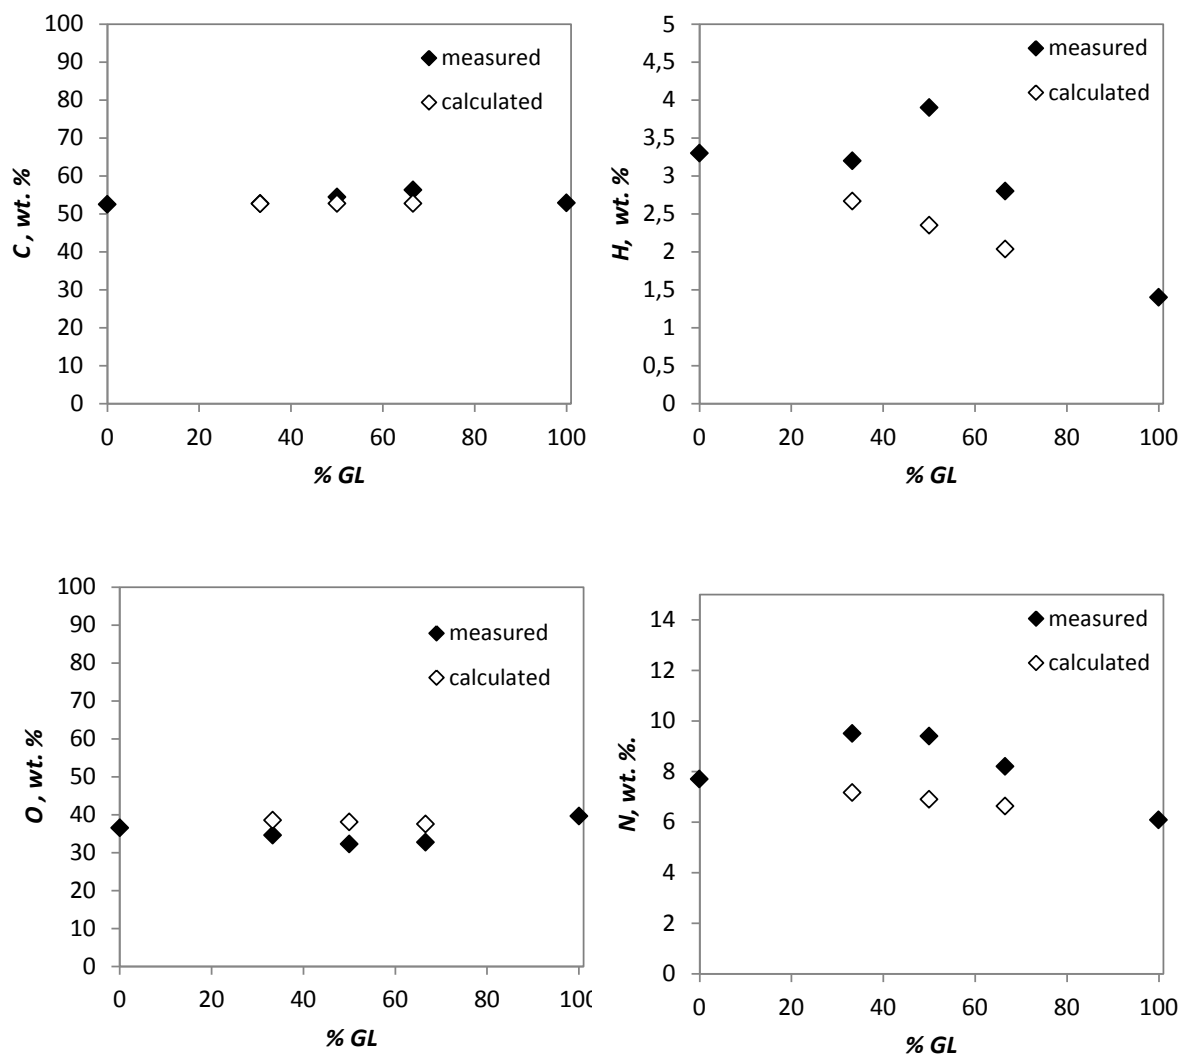

**Figure S1.** Comparison between theoretical and measured C, H, N and O contents.

The “theoretical” percentages value of each element content was calculated according with the following equation:

$$X_{\text{tot}} = X_{\text{GL}} \times f_{\text{GL}} + X_{\text{EU}} \times f_{\text{EU}}$$

where  $X_{\text{tot}}$  ( $X = \text{C}, \text{O}, \text{H}$  or  $\text{N}$ ) is the element percentage in the composite (expressed as wt. %),  $X_{\text{GL}}$  and  $X_{\text{EU}}$  are the percentage (wt. %) of the same element in GL and EU respectively, and  $f_{\text{GL}}$  and  $f_{\text{EU}}$  are the weight fractions of GL and EU in the composite ( $f_{\text{GL}} = 1 - f_{\text{EU}}$ ).

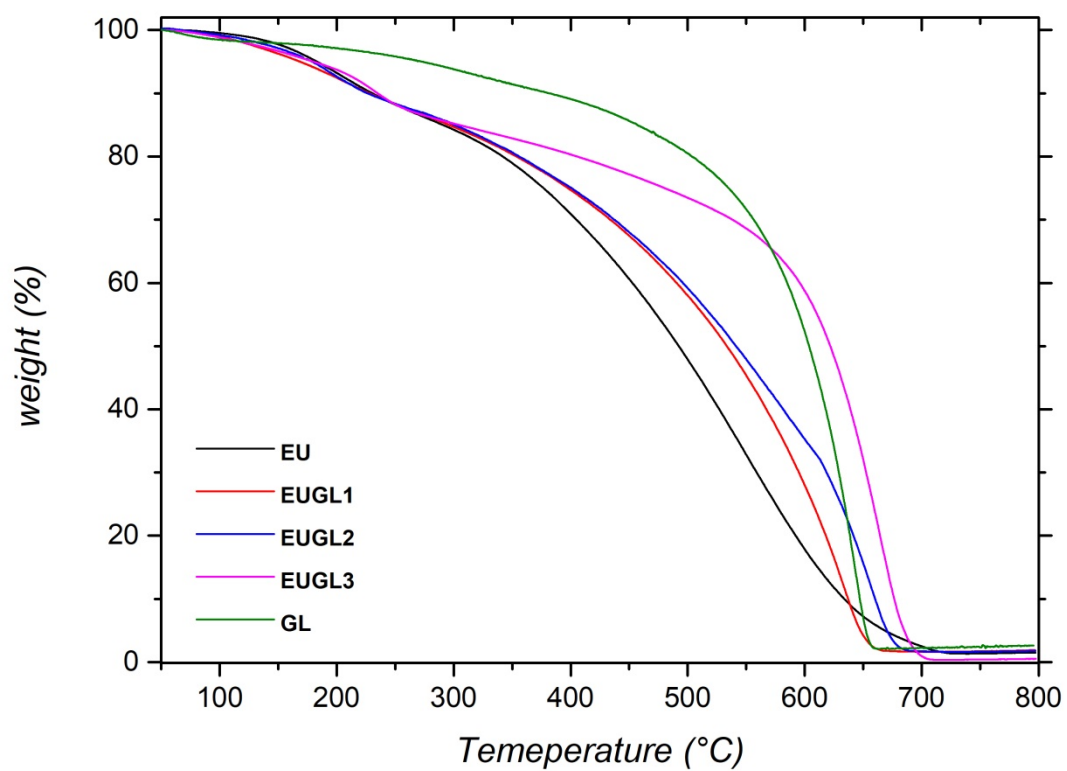

Figure S2. Thermogravimetric profiles of the EU, GL and the three hybrid materials.

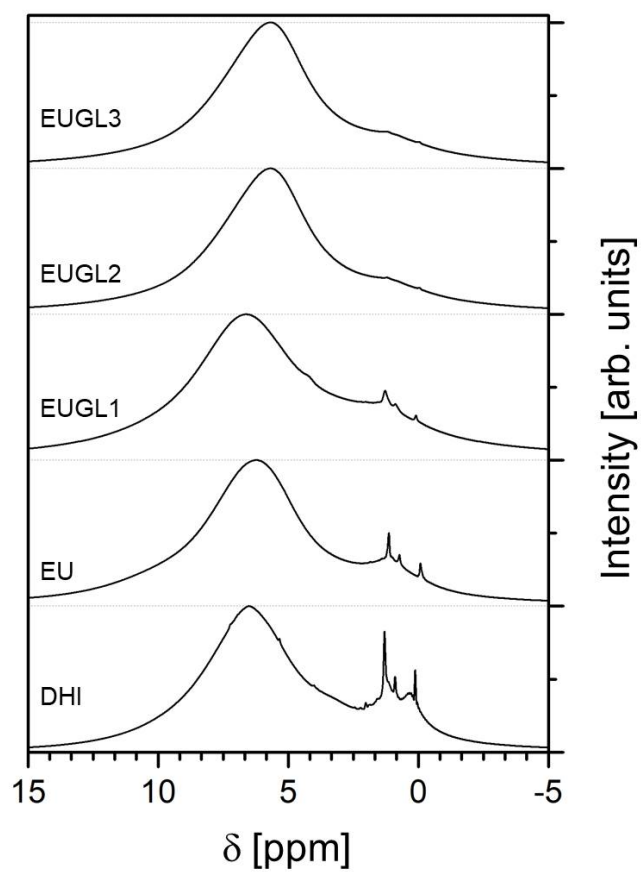Figure S3.  $^1\text{H}$  MAS NMR spectra

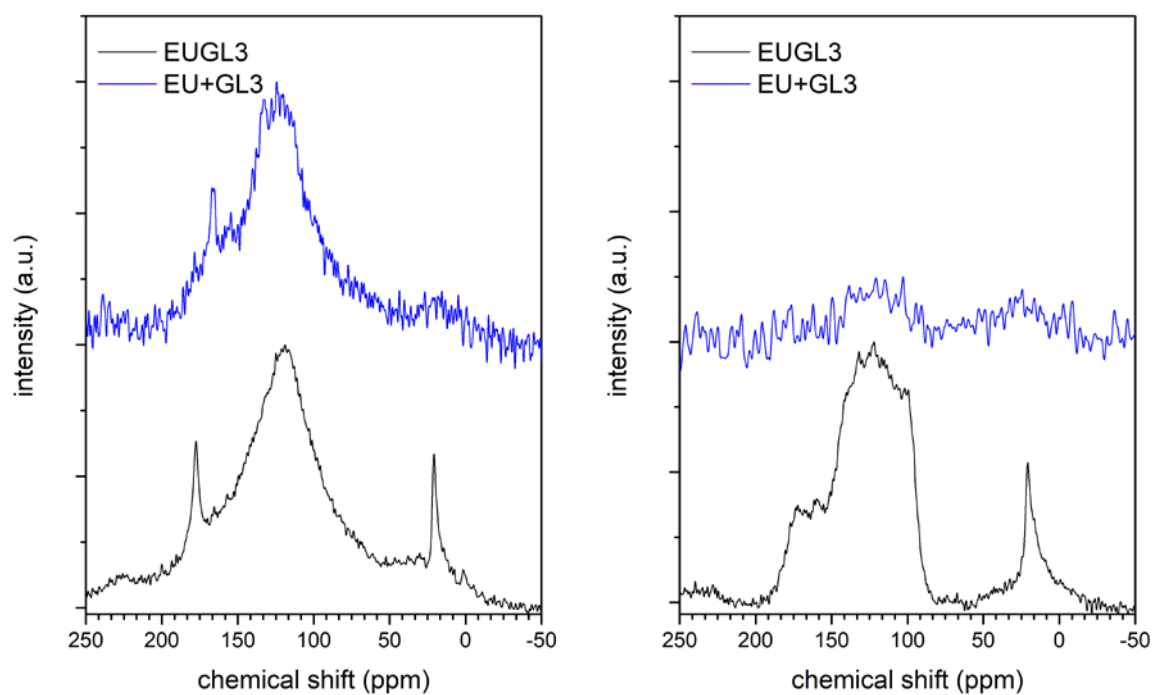

Figure S4. Left panel: comparison between  $^{13}\text{C}$  MAS NMR spectra of EUGL3 and the physical mixture EU+GL3; right panel:  $^1\text{H}$ - $^{13}\text{C}$  CPMAS NMR spectra of EUGL3 and the physical mixture EU+GL3

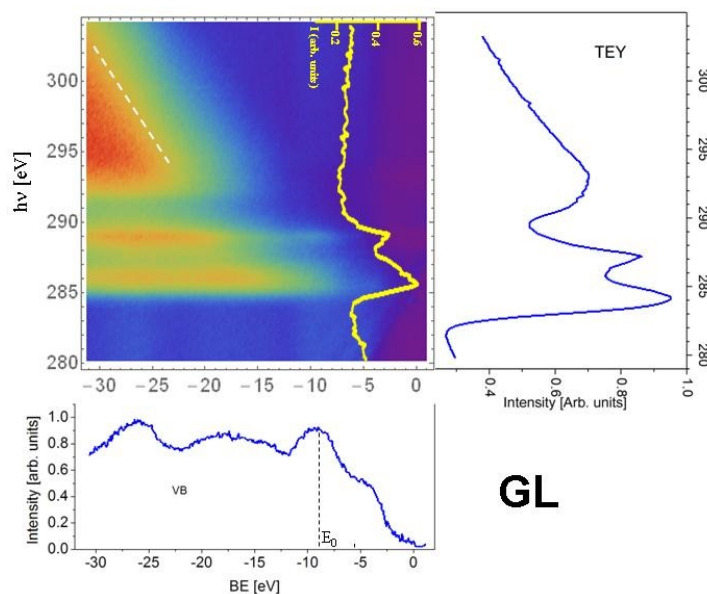

Figure S5. ResPES maps recorded on GL reported together with the extracted valence band (below the map), XAS spectrum (on the right), and a CIS profile vs. photon energy at a given energy E<sub>0</sub> corresponding to a marked feature in the valence band profile (yellow curve).
